# Supplementary material for: Triangulo-{ErIII3} complex showing field supported slow magnetic relaxation
Source: Royal Society of Chemistry journal article supplement (doi:10.1039/d2ra04328a), 2022-01-01
Supplement: d2ra04328a1.pdf [file d2ra04328a1.pdf]

## Supplementary Information

### ***Triangulo-}{Er<sup>III</sup>}\_3 complex showing field supported slow magnetic relaxation***

**Mamo Gebreziabher<sup>a,b</sup>, Sören Schlittenhardt<sup>c</sup>, Cyril Rajnák<sup>b</sup>, Juraj Kuchár<sup>d</sup>, Assefa Sergawie<sup>a</sup>,  
Juraj Černák<sup>d</sup>, Mario Ruben<sup>c,f,g</sup>, Madhu Thomas<sup>a,\*</sup> and Roman Boča<sup>b,\*</sup>**

<sup>a</sup>Department of Industrial Chemistry, College of Applied Sciences, Nanotechnology Excellence Center, Addis Ababa Science and Technology University, Addis Ababa P.O. Box 16417, Ethiopia.

<sup>b</sup>Department of Chemistry, Faculty of Natural Sciences, University of SS Cyril and Methodius 91701 Trnava, Slovakia.

<sup>c</sup>Institute of Nanotechnology, Karlsruhe Institute of Technology, Hermann-von-Helmholtz-Platz 1, 76344 Eggenstein-Leopoldshafen, Germany.

<sup>d</sup>Department of Inorganic Chemistry, Institute of Chemistry, P. J. Šafárik University in Košice, 041 80 Košice, Slovakia.

<sup>e</sup>Institute of Quantum Materials and Technologies (IQMT), Karlsruhe Institute of Technology, Hermann-von-Helmholtz-Platz 1, 76344 Eggenstein-Leopoldshafen, Germany.

<sup>f</sup>Centre Européen de Science Quantique (CESQ); Institut de Science et d'Ingénierie Supramoléculaires (ISIS, UMR 7006), CNRS-Université de Strasbourg, 8 allée Gaspard Monge BP 70028 67083 Strasbourg Cedex, France.

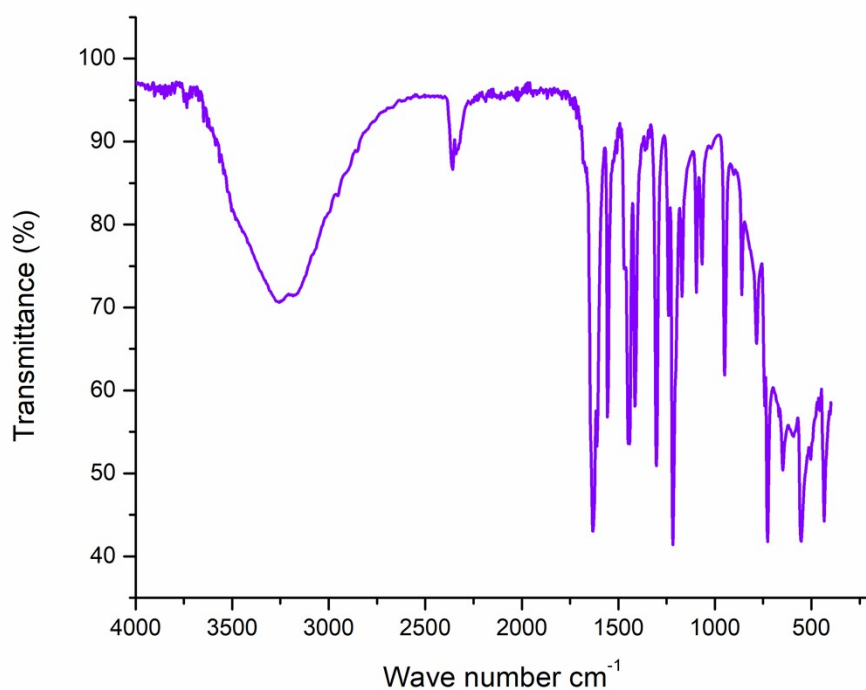

**Fig. S1.** IR spectrum of complex 1.

**Table S1.** Results of the Continuous Shape Measures calculations

-----  
 S H A P E v2.1: Continuous Shape Measures calculation (c) 2013 Electronic Structure Group,  
 Universitat de Barcelona Contact: llunell@ub.edu  
 -----

|          |    |                 |                                            |
|----------|----|-----------------|--------------------------------------------|
| OP-8     | 1  | D <sub>8h</sub> | Octagon                                    |
| HPY-8    | 2  | C <sub>7v</sub> | Heptagonal pyramid                         |
| HBPY-8   | 3  | D <sub>6h</sub> | Hexagonal bipyramid                        |
| CU-8     | 4  | O <sub>h</sub>  | Cube                                       |
| SAPR-8   | 5  | D <sub>4d</sub> | Square antiprism                           |
| TDD-8    | 6  | D <sub>2d</sub> | Triangular dodecahedron                    |
| JGBF-8   | 7  | D <sub>2d</sub> | Johnson gyrobifastigium J26                |
| JETBPY-8 | 8  | D <sub>3h</sub> | Johnson elongated triangular bipyramid J14 |
| JBTPR-8  | 9  | C <sub>2v</sub> | Biaugmented trigonal prism J50             |
| BTPR-8   | 10 | C <sub>2v</sub> | Biaugmented trigonal prism                 |
| JSD-8    | 11 | D <sub>2d</sub> | Snub diphenoid J84                         |
| TT-8     | 12 | T <sub>d</sub>  | Triakis tetrahedron                        |
| ETBPY-8  | 13 | D <sub>3h</sub> | Elongated trigonal bipyramid               |

a) ErD<sub>8</sub> in **1**

Structure **1**

[ML<sub>8</sub>] OP-8 HPY-8 HBPY-8 CU-8 SAPR-8 TDD-8 JGBF-8 JETBPY-8 JBTPR-8 BTPR-8  
JSD-8 TT-8 ETBPY-8

Er1, 31.934, 22.220, 16.116, 10.187, 2.852, **0.909**, 14.964, 29.632, 3.389, 2.877, 3.518, 10.830, 24.556

Er2, 31.824, 22.070, 15.266, 9.505, 2.908, **0.540**, 14.735, 29.004, 2.930, 2.532, 2.878, 10.365,  
24.265

Er3, 30.623, 22.103, 15.261, 11.111, 1.871, **0.921**, 13.624, 28.313, 2.634, 1.989, 2.808, 11.830,  
24.295

The polyhedra are close to **triangular dodecahedrons**

b) ErD<sub>8</sub> in [Er<sub>3</sub>Cl<sub>3</sub>(*o-van*Br)<sub>3</sub>(OH)<sub>2</sub>(CH<sub>3</sub>OH)<sub>3</sub>]Cl·3CH<sub>3</sub>OH<sup>1</sup>

Structure [ML<sub>8</sub>] OP-8 HPY-8 HBPY-8 CU-8 SAPR-8 TDD-8 JGBF-8 JETBPY-8  
JBTPR-8 BTPR-8 JSD-8 TT-8 ETBPY-8

Er1p\*, 30.146, 22.412, 16.318, 10.369, 2.082, 0.629, 14.266, 29.362, 2.278, 1.695, 2.921, 11.135,  
23.937

Er2p\*, 30.320, 21.582, 16.475, 10.406, 2.183, 1.077, 15.133, 29.372, 2.683, 2.042, 3.733, 11.036,  
23.245

Er3p\*, 31.941, 22.932, 16.363, 10.690, 2.954, 0.986, 15.242, 29.401, 3.593, 2.496, 4.048, 11.049,  
23.816

The polyhedra are close to **triangular dodecahedrons**

**Table S2** Possible hydrogen bonds in **1** [Å, °].

| D-H···A                       | D-H  | H···A | D···A    | DHA |
|-------------------------------|------|-------|----------|-----|
| O10–H10O···Cl2 <sup>i</sup>   | 0.84 | 2.47  | 3.268(3) | 161 |
| O11–H11O···Cl3                | 0.84 | 2.48  | 3.274(3) | 158 |
| O21–H21A···Cl2 <sup>ii</sup>  | 0.83 | 2.25  | 3.041(4) | 159 |
| O21–H21B···Cl2 <sup>i</sup>   | 0.84 | 2.38  | 3.212(4) | 170 |
| O22–H22A···Cl3                | 0.84 | 2.40  | 3.175(4) | 154 |
| O22–H22B···O35A               | 0.84 | 1.84  | 2.669(8) | 168 |
| O23–H23A···Cl3 <sup>iii</sup> | 0.84 | 2.26  | 3.100(4) | 176 |
| O23–H23B···Cl3                | 0.84 | 2.33  | 3.157(4) | 166 |

|                              |      |       |          |     |
|------------------------------|------|-------|----------|-----|
| O24–H24A···Cl1 <sup>iv</sup> | 0.84 | 2.32  | 3.161(3) | 177 |
| O24–H24B···O34               | 0.84 | 1.88  | 2.724(7) | 175 |
| O25–H25A···Cl2 <sup>i</sup>  | 0.84 | 2.305 | 3.126(3) | 165 |
| O25–H25B···Cl4B <sup>i</sup> | 0.84 | 2.34  | 3.173(5) | 171 |
| O25–H25B···O31 <sup>i</sup>  | 0.84 | 1.78  | 2.609(9) | 169 |

Symmetry codes: i: 1-x, -1/2+y, 1/2-z; ii: -1/2+x, 1-y, z; iii: 1-x, 1-y, 1-z; iv: 1/2+x, 1-y, z.

**Table S3.** Crystal data and structure refinement for **1**.

|                                        |                                                                                    |
|----------------------------------------|------------------------------------------------------------------------------------|
| Empirical formula                      | C <sub>24</sub> H <sub>33</sub> O <sub>25.47</sub> Cl <sub>4</sub> Er <sub>3</sub> |
| Formula weight                         | 1372.613                                                                           |
| Temperature/K                          | 95.15                                                                              |
| Crystal system                         | monoclinic                                                                         |
| Space group                            | I2/a                                                                               |
| a/Å                                    | 17.1520(3)                                                                         |
| b/Å                                    | 17.8706(4)                                                                         |
| c/Å                                    | 30.2439(6)                                                                         |
| $\alpha$ /°                            | 90                                                                                 |
| $\beta$ /°                             | 97.7617(18)                                                                        |
| $\gamma$ /°                            | 90                                                                                 |
| Volume/Å <sup>3</sup>                  | 9185.3(3)                                                                          |
| Z                                      | 8                                                                                  |
| $\rho_{\text{calc}}$ /cm <sup>3</sup>  | 1.985                                                                              |
| $\mu$ /mm <sup>-1</sup>                | 5.743                                                                              |
| F(000)                                 | 5230.3                                                                             |
| Crystal size/mm <sup>3</sup>           | yellow block<br>0.204 × 0.125 × 0.118                                              |
| Radiation / Å                          | Mo K $\alpha$ ( $\lambda$ = 0.71073)                                               |
| 2 $\theta$ range for data collection/° | 4.08 – 53.00                                                                       |
| Index ranges                           | -23 ≤ h ≤ 22<br>-23 ≤ k ≤ 23<br>-25 ≤ l ≤ 40                                       |

|                                               |                                                                  |
|-----------------------------------------------|------------------------------------------------------------------|
| Reflections collected                         | 25470                                                            |
| Independent reflections                       | 9623 [ $R_{\text{int}} = 0.0241$ , $R_{\text{sigma}} = 0.0344$ ] |
| Data/restraints/parameters                    | 9623/17/613                                                      |
| Goodness-of-fit on $F^2$                      | 1.067                                                            |
| Final R indexes [ $I \geq 2\sigma(I)$ ]       | $R_1 = 0.0303$ , $wR_2 = 0.0674$                                 |
| Final R indexes [all data]                    | $R_1 = 0.0389$ , $wR_2 = 0.0710$                                 |
| Largest diff. peak/hole / $e.\text{\AA}^{-3}$ | 1.84/-1.53                                                       |

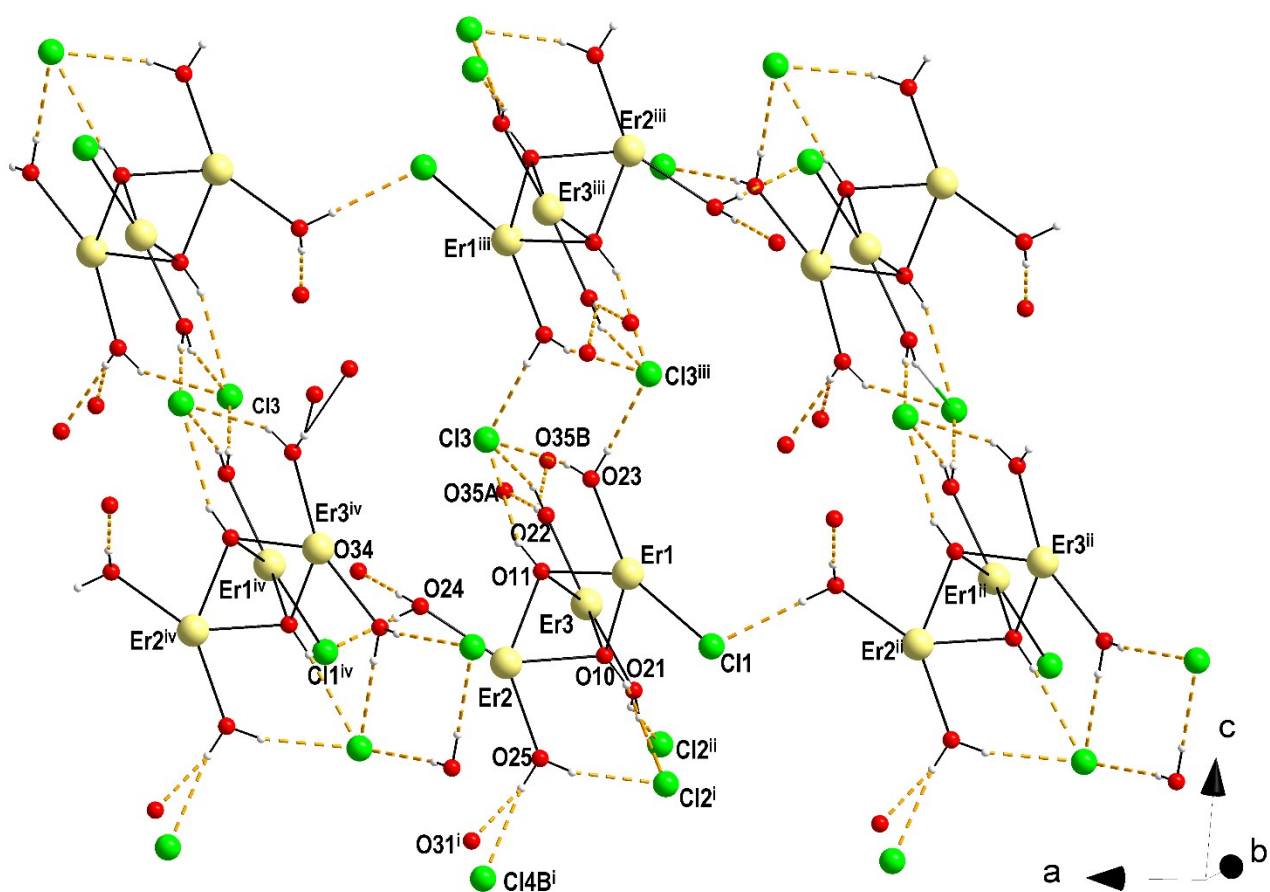

**Fig. S2.** View on hydrogen bonding system in **1** formed by O-H...O and O-H...Cl hydrogen bonds. Symmetry codes: i:  $1-x, y-0.5, 0.5-z$ ; ii:  $x-0.5, 1-y, z$ ; iii:  $1-x, 1-y, 1-z$ ; iv:  $0.5+x, 1-y, z$ .

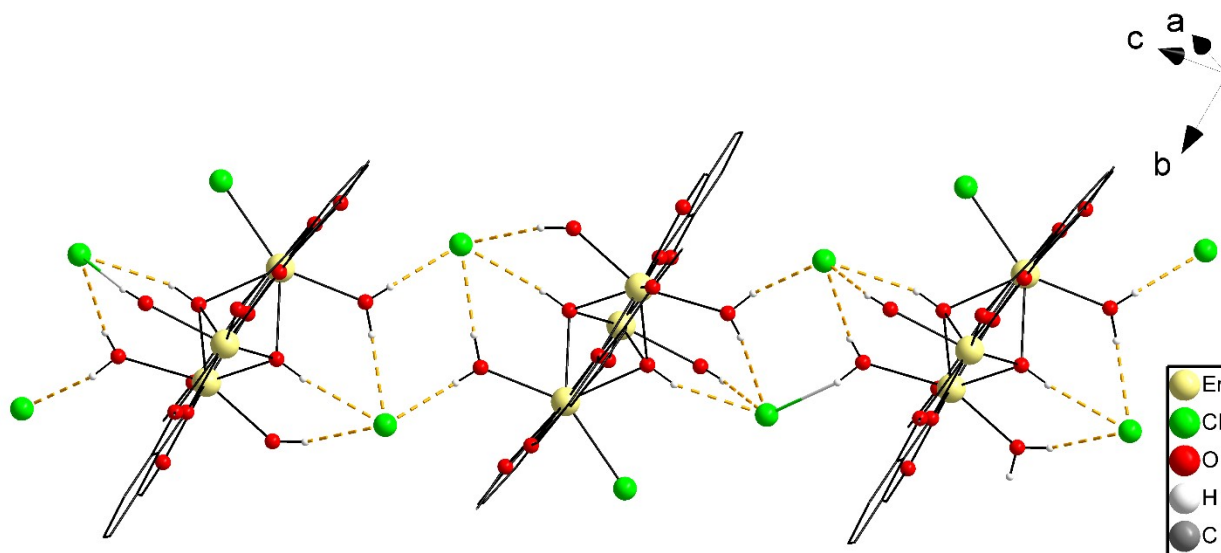

**Fig.S3.** View on the chain-like arrangement of trinuclear  $\{\text{Er}_3\}$  entities linked by hydrogen bonds of the O-H...Cl type. Only hydrogen atoms involved in the propagation of chains are shown.

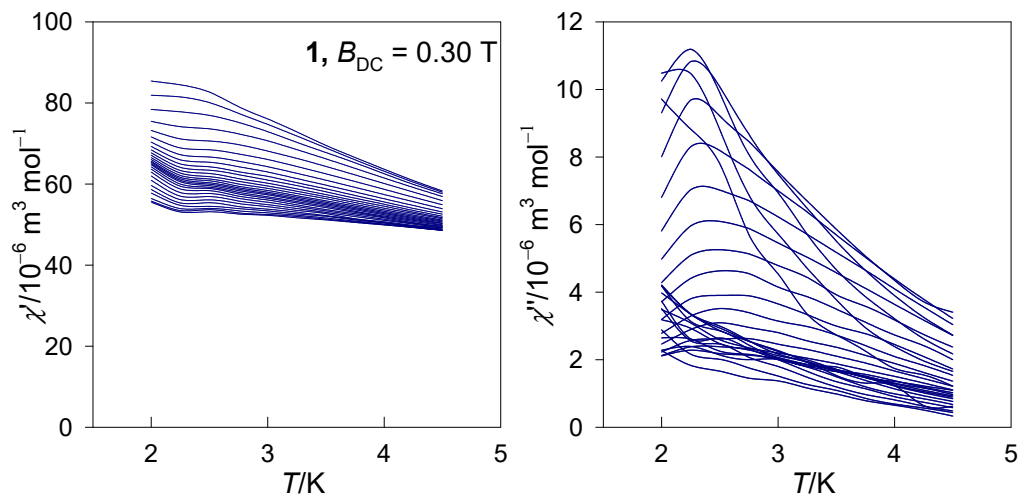

**Fig. S4.** Temperature dependence of the AC susceptibility for **1** at  $B_{\text{DC}} = 0.3$  T depending upon the frequency of the AC field.

The Debye equation for AC susceptibility can be extended to the *two-set Debye model*

$$\chi(\omega) = \chi_S + \frac{\chi_{T1} - \chi_S}{1 + (i\omega\tau_1)^{1-\alpha_1}} + \frac{\chi_{T2} - \chi_{T1}}{1 + (i\omega\tau_2)^{1-\alpha_2}}$$

which splits into the in-phase component

$$\begin{aligned} \chi'(\omega) = & \chi_S + (\chi_{T1} - \chi_S) \frac{1 + (\omega\tau_1)^{1-\alpha_1} \sin(\pi\alpha_1 / 2)}{1 + 2(\omega\tau_1)^{1-\alpha_1} \sin(\pi\alpha_1 / 2) + (\omega\tau_1)^{2-2\alpha_1}} \\ & + (\chi_{T2} - \chi_{T1}) \frac{1 + (\omega\tau_2)^{1-\alpha_2} \sin(\pi\alpha_2 / 2)}{1 + 2(\omega\tau_2)^{1-\alpha_2} \sin(\pi\alpha_2 / 2) + (\omega\tau_2)^{2-2\alpha_2}} \end{aligned}$$

and the out-of-phase component

$$\begin{aligned} \chi''(\omega) = & (\chi_{T1} - \chi_S) \frac{(\omega\tau_1)^{1-\alpha_1} \cos(\pi\alpha_1 / 2)}{1 + 2(\omega\tau_1)^{1-\alpha_1} \sin(\pi\alpha_1 / 2) + (\omega\tau_1)^{2-2\alpha_1}} \\ & + (\chi_{T2} - \chi_{T1}) \frac{(\omega\tau_2)^{1-\alpha_2} \cos(\pi\alpha_2 / 2)}{1 + 2(\omega\tau_2)^{1-\alpha_2} \sin(\pi\alpha_2 / 2) + (\omega\tau_2)^{2-2\alpha_2}} \end{aligned}$$

with the constraint for the isothermal and adiabatic susceptibilities  $\chi_S < \chi_{T1} < \chi_{T2}$  in order to get positive contributions from each primitive component.

**Table S4.** Fitted AC susceptibility data at  $T = 2.0$  K <sup>a</sup>

| $B/T$ | $\chi_S$ | $\chi_{LF}$ | $\alpha_{LF}$ | $\tau_{LF}/s$ | $\chi_{HF}$ | $\alpha_{HF}$ | $\tau_{HF}/\mu s$ | $\chi_{LF}$ |
|-------|----------|-------------|---------------|---------------|-------------|---------------|-------------------|-------------|
| 0.1   | 112      | 116         | .06           | <b>0.195</b>  | 125         | .39           | <b>239</b>        | 0.30        |
| 0.2   | 79       | 98          | .31           | <b>0.618</b>  | 111         | .23           | <b>413</b>        | 0.61        |
| 0.3   | 55       | 87          | .38           | <b>1.46</b>   | 99          | .16           | <b>504</b>        | 0.74        |
| 0.4   | 39       | 64          | .37           | <b>1.09</b>   | 74          | .15           | <b>542</b>        | 0.74        |
| 0.5   | 29       | 56          | .42           | <b>2.00</b>   | 63          | .10           | <b>560</b>        | .80         |

<sup>a</sup> AC susceptibility components in unit of  $10^{-6} \text{ m}^3 \text{ mol}^{-1} [\text{SI}]$ .

**Table S5.** Fitted AC susceptibility data at  $B_{DC} = 0.3$  T

| $T/K$ | $\chi_S$ | $\chi_{LF}$ | $\alpha_{LF}$ | $\tau_{LF}/s$ | $\chi_{HF}$ | $\alpha_{HF}$ | $\tau_{HF}/ms^a$ | $\chi_{LF}$ |
|-------|----------|-------------|---------------|---------------|-------------|---------------|------------------|-------------|
| 2.00  | 54       | 86          | .29           | <b>1.23</b>   | 98          | .24           | <b>0.62</b>      | 0.73        |
| 2.25  | 51       | 80          | .19           | <b>0.73</b>   | 92          | .38           | <b>0.86</b>      | 0.71        |
| 2.50  | 51       | 79          | .24           | <b>0.63</b>   | 89          | .36           | <b>0.67</b>      | 0.74        |
| 2.75  | 50       | 73          | .20           | <b>0.47</b>   | 83          | .44           | <b>0.80</b>      | 0.69        |
| 3.00  | 50       | 69          | .17           | <b>0.42</b>   | 78          | .50           | <b>1.00</b>      | 0.66        |
| 3.25  | 50       | 66          | .15           | <b>0.37</b>   | 75          | .50           | <b>1.26</b>      | 0.65        |
| 3.50  | 49       | 61          | .09           | <b>0.35</b>   | 71          | .60           | <b>2.86</b>      | 0.54        |
| 3.75  | 49       | 59          | .07           | <b>0.32</b>   | 67          | .60           | <b>4.11</b>      | 0.55        |
| 4.00  | 49       | 57          | .05           | <b>0.30</b>   | 64          | .58           | <b>4.51</b>      | 0.52        |
| 4.25  | 48       | 55          | .03           | <b>0.29</b>   | 62          | .59           | <b>8.49</b>      | 0.50        |
| 4.50  | 48       | 53          | .01           | <b>0.29</b>   | 59          | .55           | <b>8.53</b>      | 0.52        |

<sup>a</sup> Note, the high-frequency relaxation time on heating is not decreasing (as usual) but increasing! This is a “reciprocating thermal behaviour”.

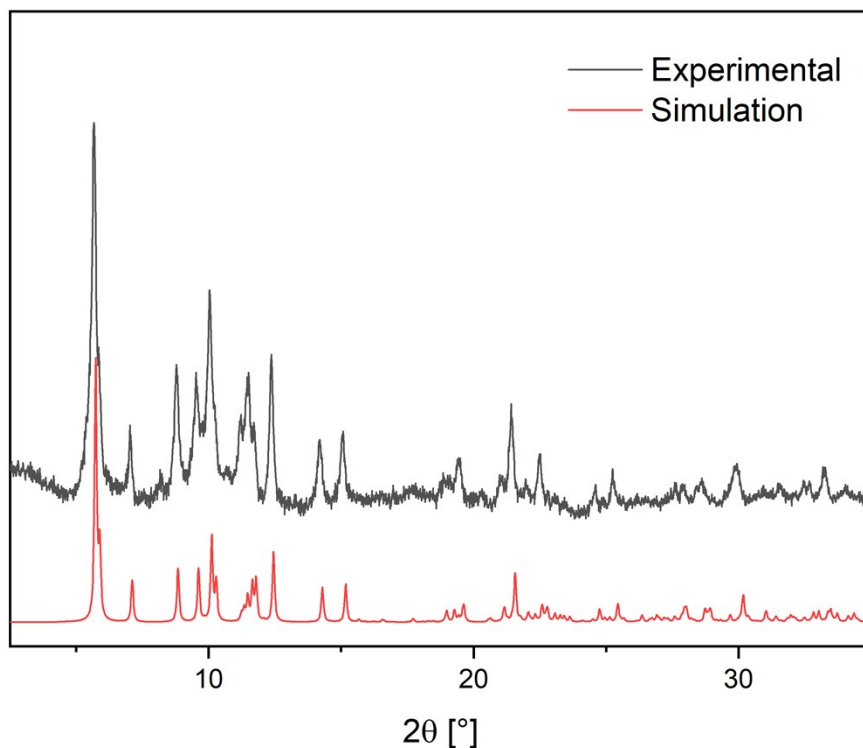**Fig. S5** X-ray powder diffraction patterns of 1 (simulated and experimental).



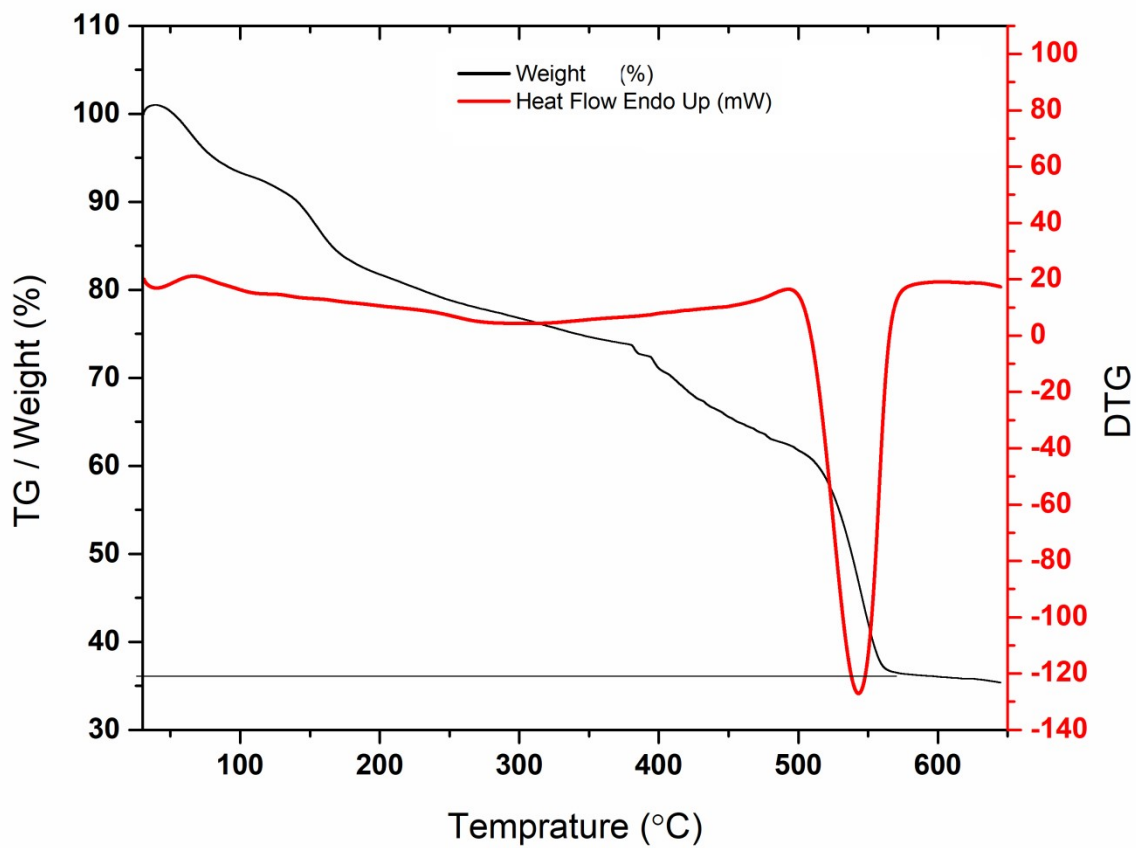

Fig.S6. Thermogravimetric analysis curve for complex 1.

### Reference

- 1 X. Yang, R. A. Jones and M. J. Wiester, *Dalt. Trans.*, 2004, **3**, 1787–1788.
